# Supplementary material for: Aqueous biphasic hydroformylation in the presence of cyclodextrins mixtures: evidence of a positive synergistic effect
Source: Royal Society of Chemistry journal article supplement (doi:10.1039/c2dt30646h), 2012-01-01
Supplement: c2dt30646h.pdf [file c2dt30646h.pdf]

## Electronic Supplementary Information

### **Aqueous biphasic hydroformylation in the presence of cyclodextrins mixtures: evidence of a positive synergistic effect.**

Michel Ferreira <sup>a,b,c</sup>, François-Xavier Legrand <sup>a,b,c</sup>, Cécile Machut <sup>a,b,c</sup>, Hervé Bricout <sup>a,b,c</sup>, Sébastien Tilloy <sup>a,b,c</sup>, Eric Monflier <sup>a,b,c</sup>.

<sup>a</sup> Université Lille Nord de France, F-59000 Lille, France

<sup>b</sup> UArtois, Unité de Catalyse et de Chimie du Solide (UCCS), F-62300 Lens, France.

<sup>c</sup> CNRS, UMR 8181.

### General procedure for surface tension measurements.

Surface tension measurements of aqueous solutions of chemically modified cyclodextrin(s) (the total concentration of cyclodextrins was equal to  $42 \text{ mmol.L}^{-1}$ ) were performed at  $20^\circ\text{C}$  with the pendant drop method using an OCA-15 plus (DataPhysics) tensiometer. All equilibrium surface tension values were mean quantities of at least three measurements. The standard deviation of the mean never deviated  $\pm 1.5\%$  of the mean.

Fig. S1. Surface tension measurements of different RAME- $\alpha$ -CD / RAME- $\beta$ -CD mixtures

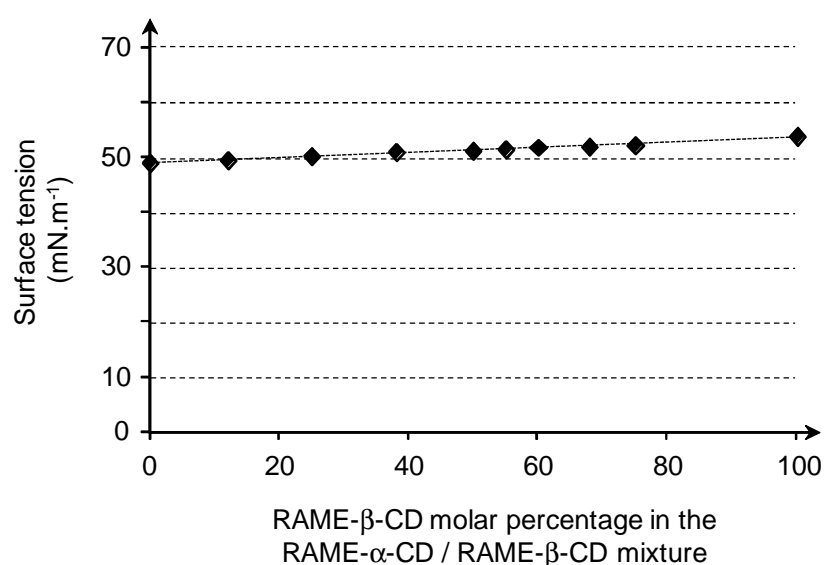

Fig. S2. Surface tension measurements of different RAME- $\alpha$ -CD / RAME- $\gamma$ -CD mixtures

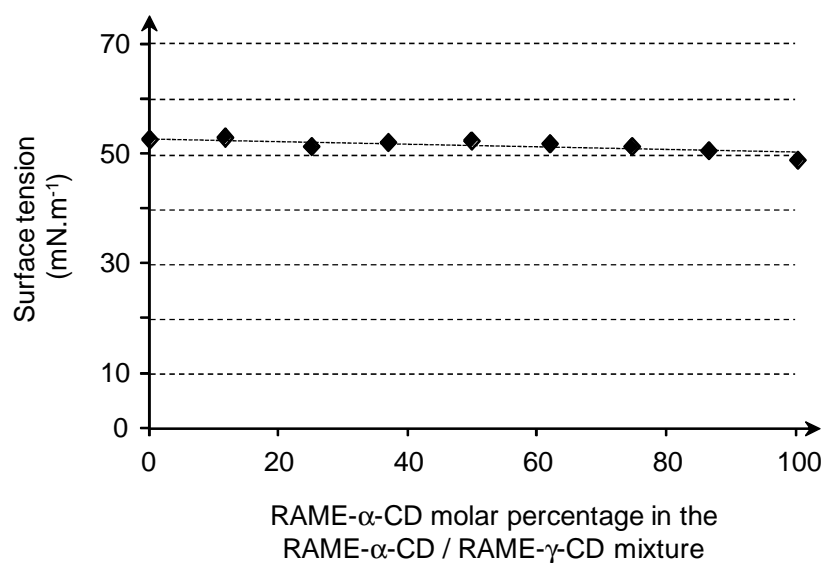

Fig. S3. Surface tension measurements of different RAME- $\beta$ -CD / RAME- $\gamma$ -CD mixtures

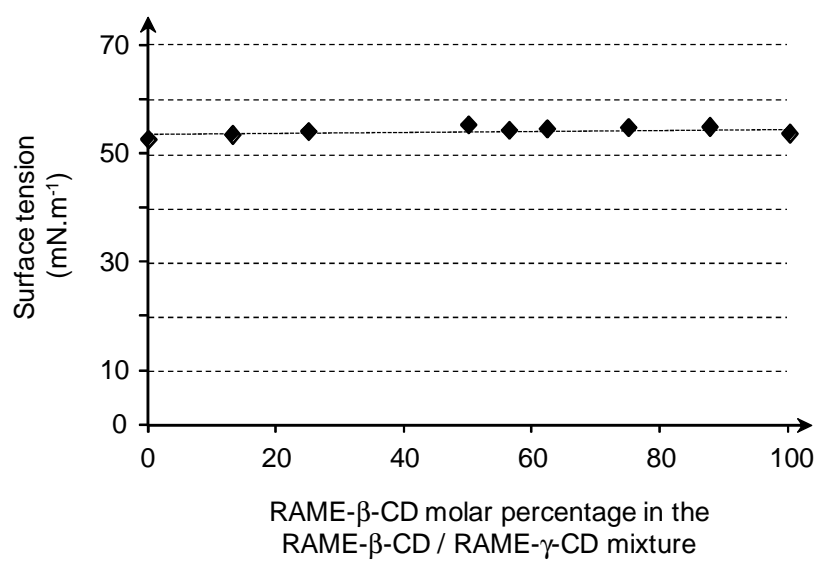

**Calculation of the free RAME- $\beta$ -CD percentage compared to the total amount of free CD when inclusion complexes between TPPTS and RAME- $\beta$ -CD were taken into account (relative to the figure 3).**

The percentage of free RAME- $\beta$ -CD in a considered catalytic experiment has been determinate by using the following equation:

$$\text{free RAME-}\beta\text{-CD (\%)} = \frac{[\text{RAME-}\beta\text{-CD}]_{\text{T}} - [\text{COMPLEX}]}{[\text{CD}]_{\text{T}} - [\text{COMPLEX}]} \times 100$$

where  $[\text{CD}]_{\text{T}}$  represents the total CD concentration ( $[\text{CD}]_{\text{T}} = 42 \text{ mM}$ ),  $[\text{RAME-}\beta\text{-CD}]_{\text{T}}$  the RAME- $\beta$ -CD concentration in the considered catalytic experiment (*i.e.*  $[\text{CD}]_{\text{T}} \times$  molar fraction of RAME- $\beta$ -CD in the considered catalytic experiment) and  $[\text{COMPLEX}]$  the RAME- $\beta$ -CD:TPPTS complex concentration.

The RAME- $\beta$ -CD:TPPTS complex concentration in the considered catalytic experiment can be easily calculated from the following equation:

$$[\text{COMPLEX}] = \frac{1}{2} \times \left( \frac{1}{K_{\text{RAME-}\beta\text{-CD:TPPTS}}} + [\text{RAME-}\beta\text{-CD}]_{\text{T}} + [\text{TPPTS}]_{\text{T}} \right) - \frac{1}{2} \times \sqrt{\left( \frac{1}{K_{\text{RAME-}\beta\text{-CD:TPPTS}}} + [\text{RAME-}\beta\text{-CD}]_{\text{T}} + [\text{TPPTS}]_{\text{T}} \right)^2 - 4 \times [\text{RAME-}\beta\text{-CD}]_{\text{T}} \times [\text{TPPTS}]_{\text{T}}}$$

where  $K_{\text{RAME-}\beta\text{-CD:TPPTS}}$  stand for the RAME- $\beta$ -CD:TPPTS complex association constant which is equal to  $805 \text{ M}^{-1}$  at  $20^{\circ}\text{C}$  in the case of commercial RAME- $\beta$ -CD possessing a degree of substitution equal to  $1.8^{\text{i}}$ .

The value of  $[\text{TPPTS}]_{\text{T}}$  has been calculated by considering the free TPPTS amount *i.e.* two equivalents of TPPTS on the five introduced for one rhodium. Indeed, three equivalents of TPPTS are involved in the formation of the catalytic precursor  $\text{HRh}(\text{CO})(\text{TPPTS})_3$ . So, the  $[\text{TPPTS}]_{\text{T}}$  is equal to  $7.3 \text{ mM}$  (*i.e.*  $2/5$  of the concentration of the catalytic experiments which is equal to  $18.3 \text{ mM}$ ).

---

<sup>i</sup> F.X. Legrand, M. Sauthier, C. Flahaut, J. Hachani, C. Elfakir, S. Fourmentin, S. Tilloy, E. Monflier, *J. Mol. Catal. A: Chem.* 2009, **303**, 72.
